# Supplementary material for: Boosting electrocatalytic water oxidation of NiFe layered double hydroxide via the synergy of 3d–4f electron interaction and citrate intercalation
Source: Royal Society of Chemistry journal article supplement (doi:10.1039/d2ta06801j), 2022-12-13
Supplement: d2ta06801j1.pdf [file d2ta06801j1.pdf]

## **Boosting Electrocatalytic Water Oxidation of NiFe Layered Double Hydroxide *via* the Synergy of 3d-4f Electron Interaction and Citrate Intercalation**

*Shuo Chen,<sup>a</sup> Zhicheng Zheng,<sup>a</sup> Qing ying Li,<sup>a</sup> Hao Wan,<sup>b,\*</sup> Gen Chen,<sup>a</sup> Ning Zhang,<sup>a</sup> Xiaohe Liu,<sup>a,b,\*</sup> Renzhi Ma<sup>c,\*</sup>*

<sup>a</sup> School of Materials Science and Engineering, Central South University, Changsha, Hunan 410083, P. R. China. E-mail: liuxh@csu.edu.cn

<sup>b</sup> Zhongyuan Critical Metals Laboratory, Zhengzhou University, Zhengzhou 450001, P. R. China. E-mail: wanhao@zzu.edu.cn

<sup>c</sup> International Center for Materials Nanoarchitectonics (WPI-MANA), National Institute for Materials Science (NIMS), Namiki 1-1, Tsukuba, Ibaraki 305-0044, Japan. E-mail: Ma.Renzhi@nims.go.jp

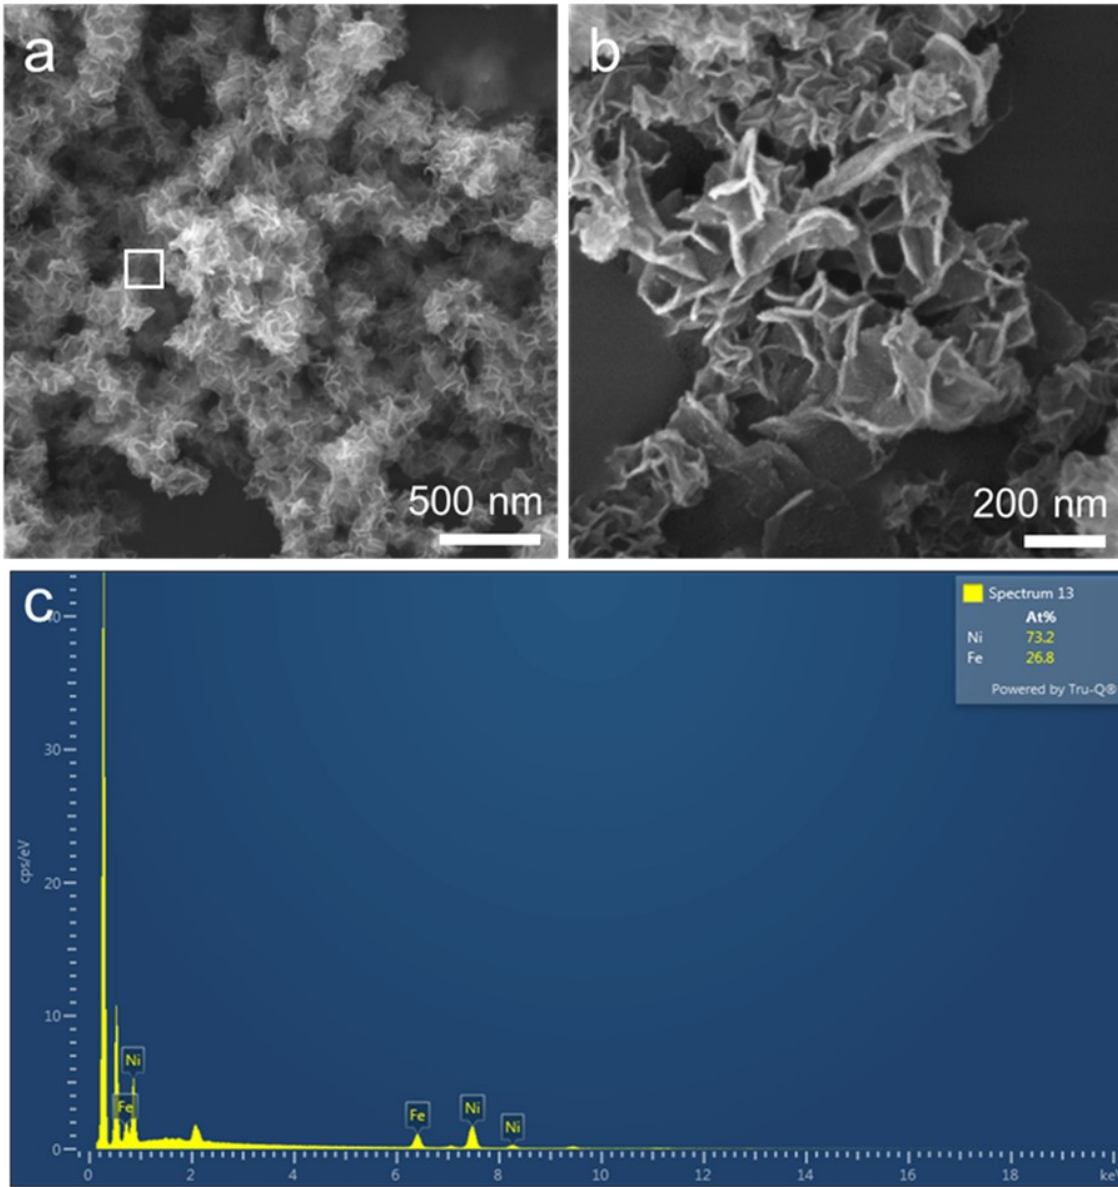

Figure S1. (a-b) SEM images and (c) EDX result of  $\text{Ni}_2\text{Fe}_1$  PNs.

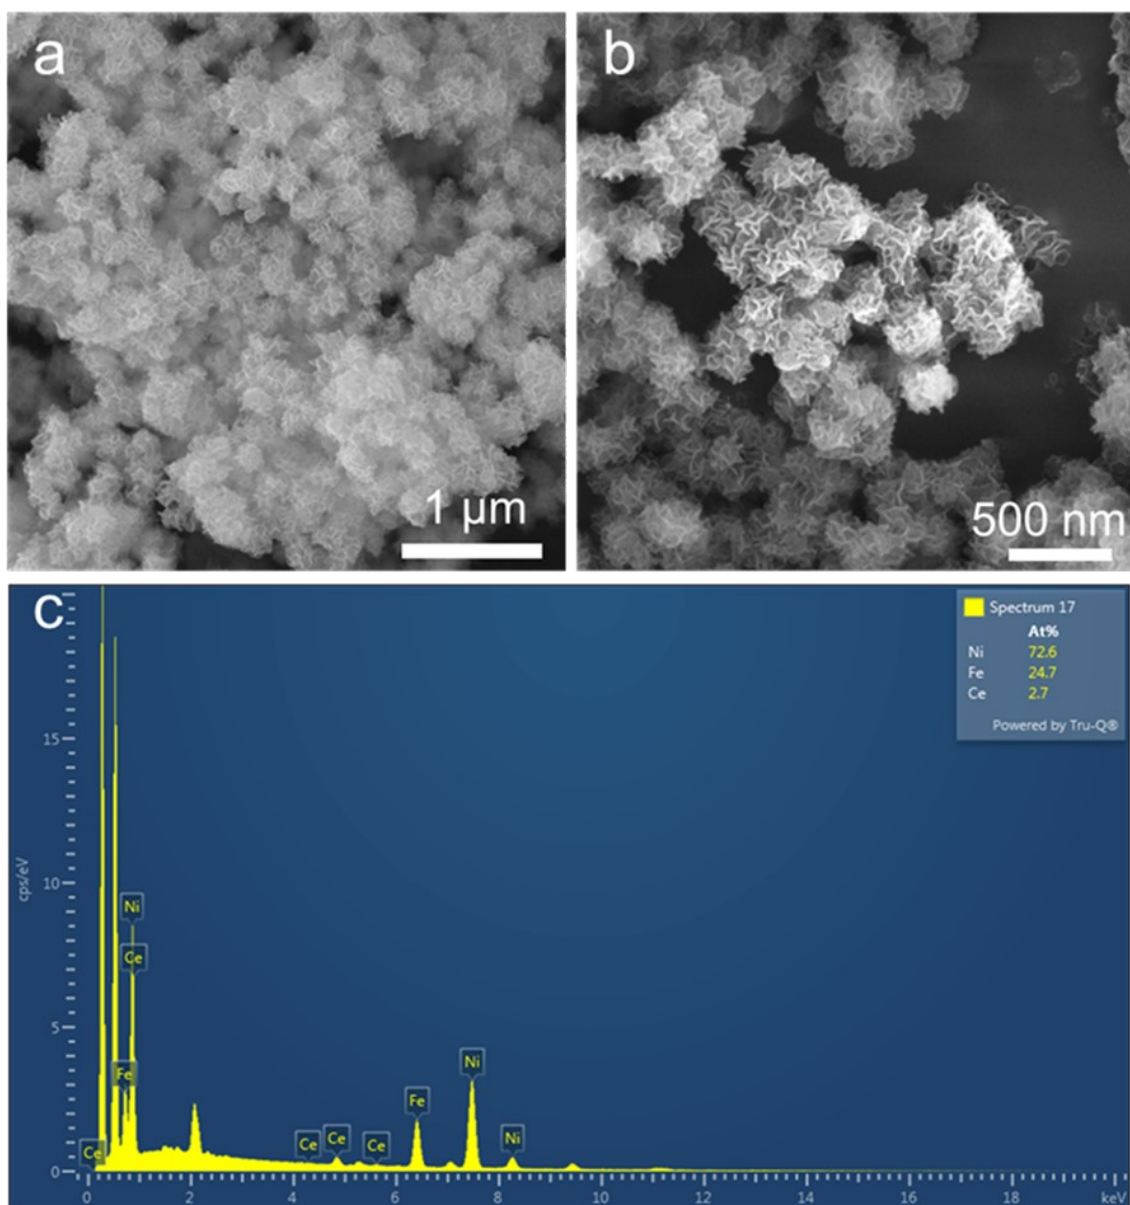

Figure S2. (a-b) SEM images and (c) EDX result of  $\text{Ni}_2\text{Fe}_{0.9}\text{Ce}_{0.1}$  PNs.

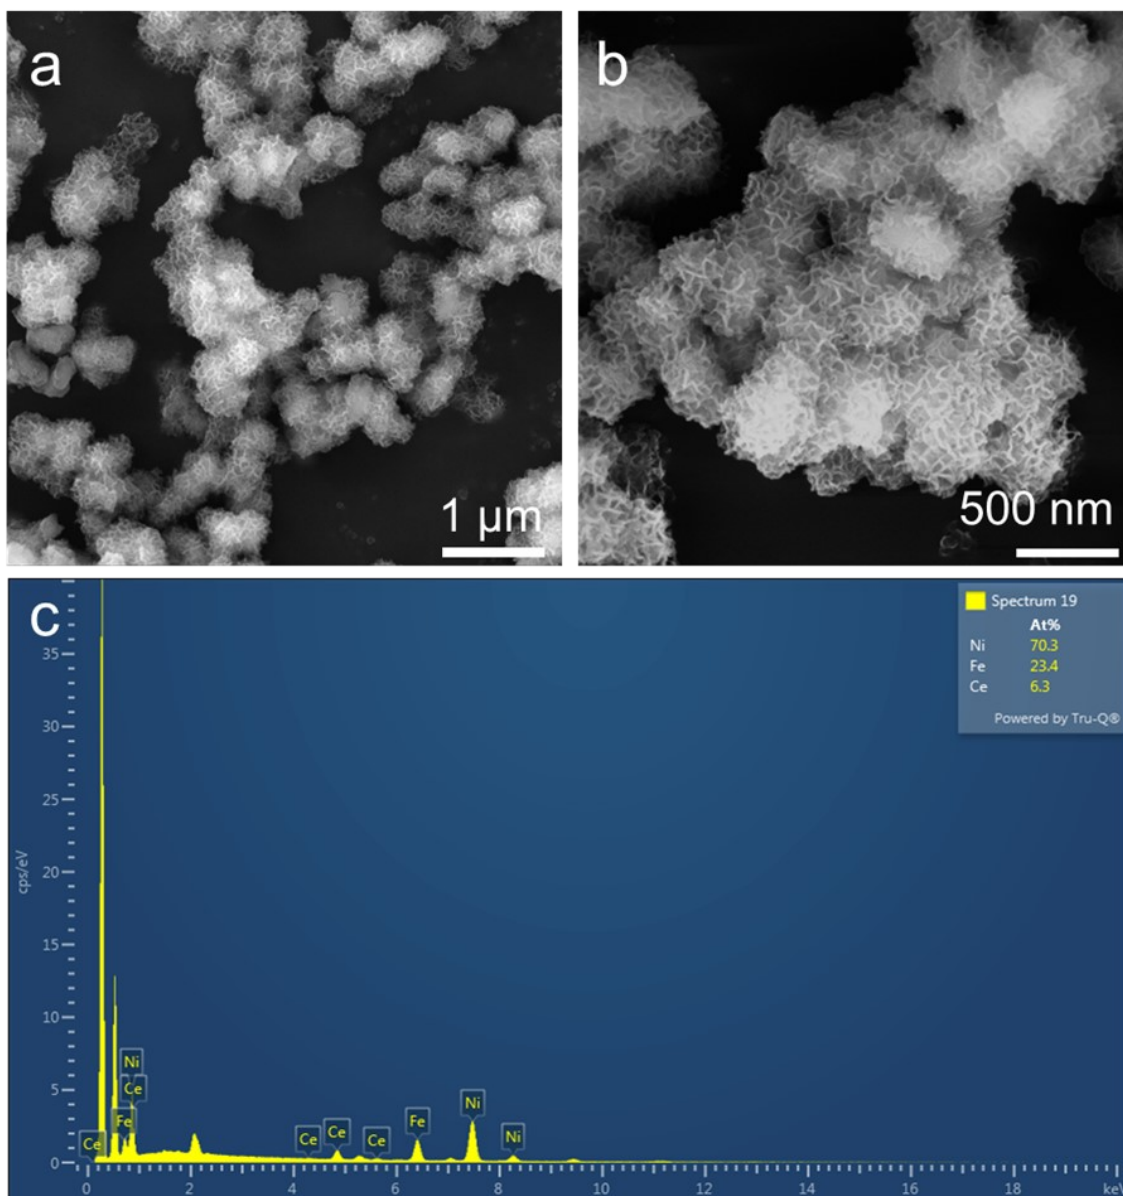

Figure S3. (a-b) SEM images and (c) EDX result of  $\text{Ni}_2\text{Fe}_{0.8}\text{Ce}_{0.2}$  PNs.

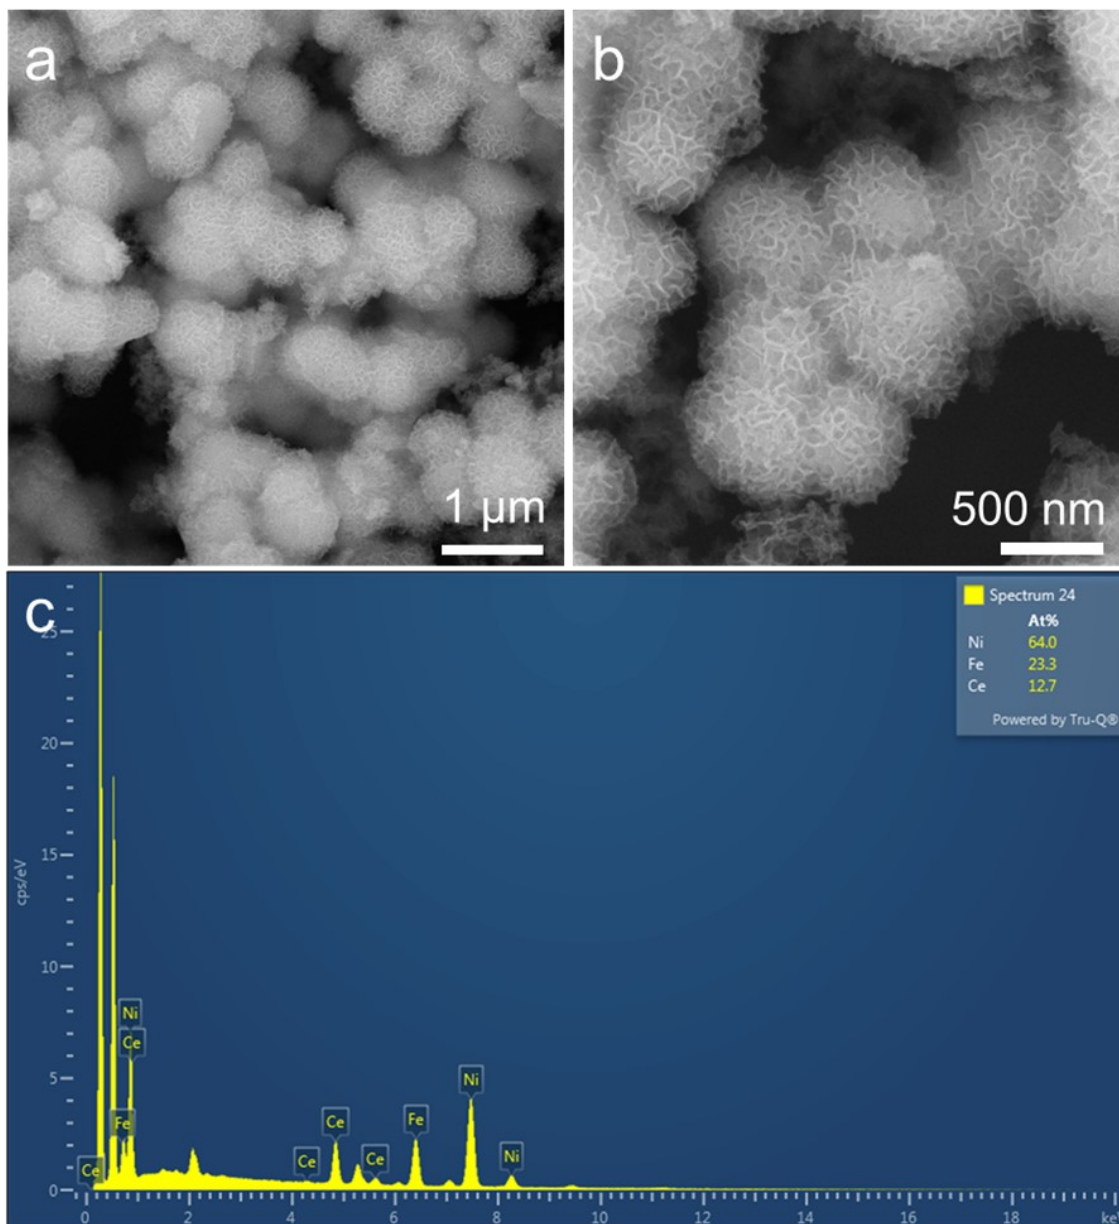

Figure S4. (a-b) SEM images and (c) EDX result of  $\text{Ni}_2\text{Fe}_{0.7}\text{Ce}_{0.3}$  PNs.

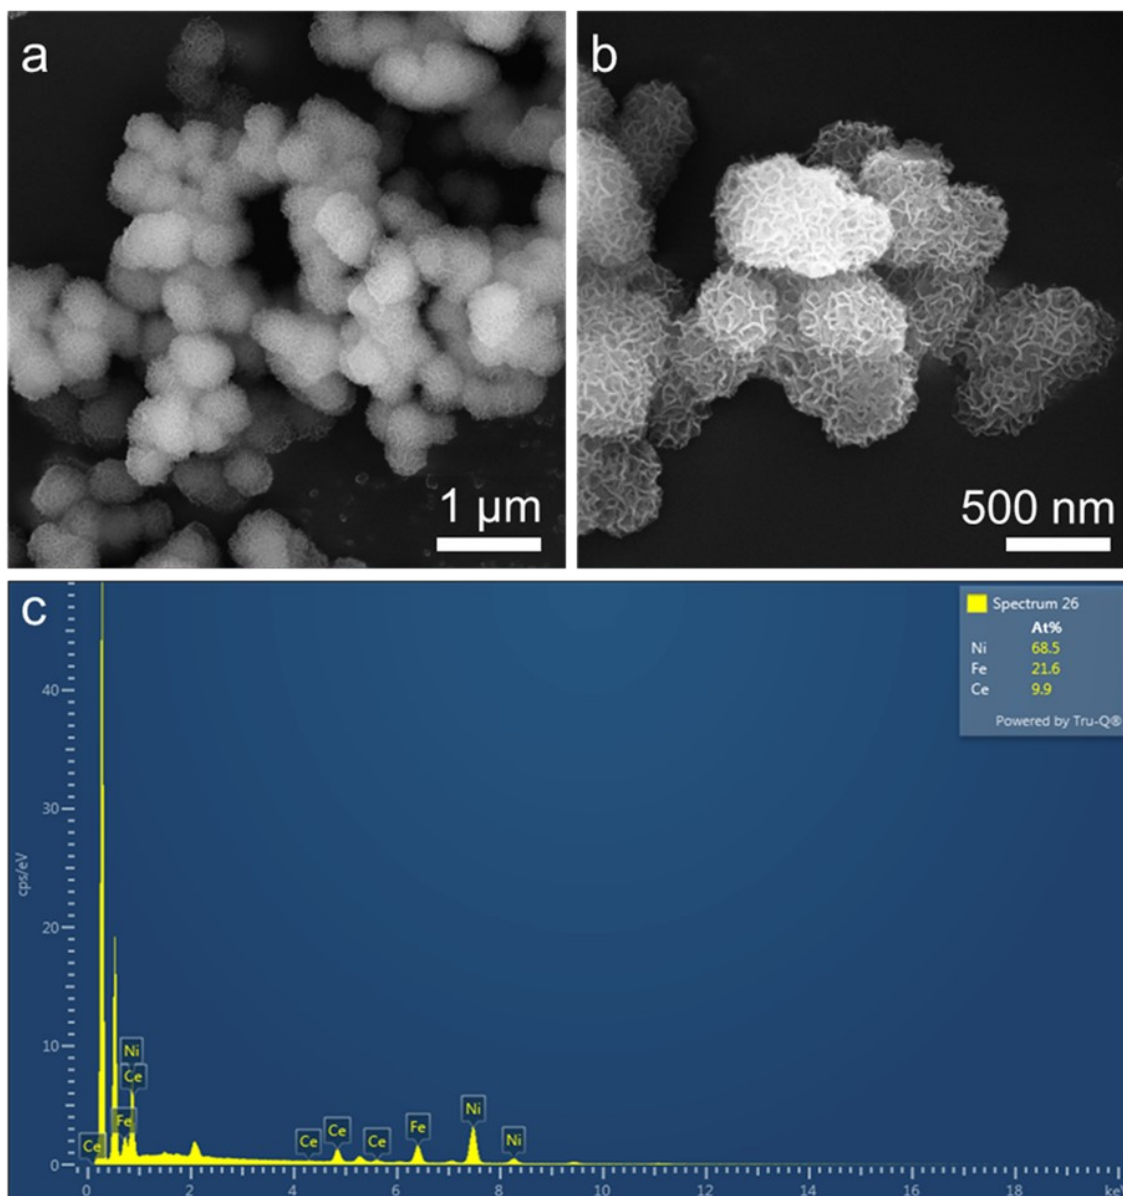

Figure S5. (a-b) SEM images and (c) EDX result of  $\text{Ni}_2\text{Fe}_{0.6}\text{Ce}_{0.4}$  PNs.



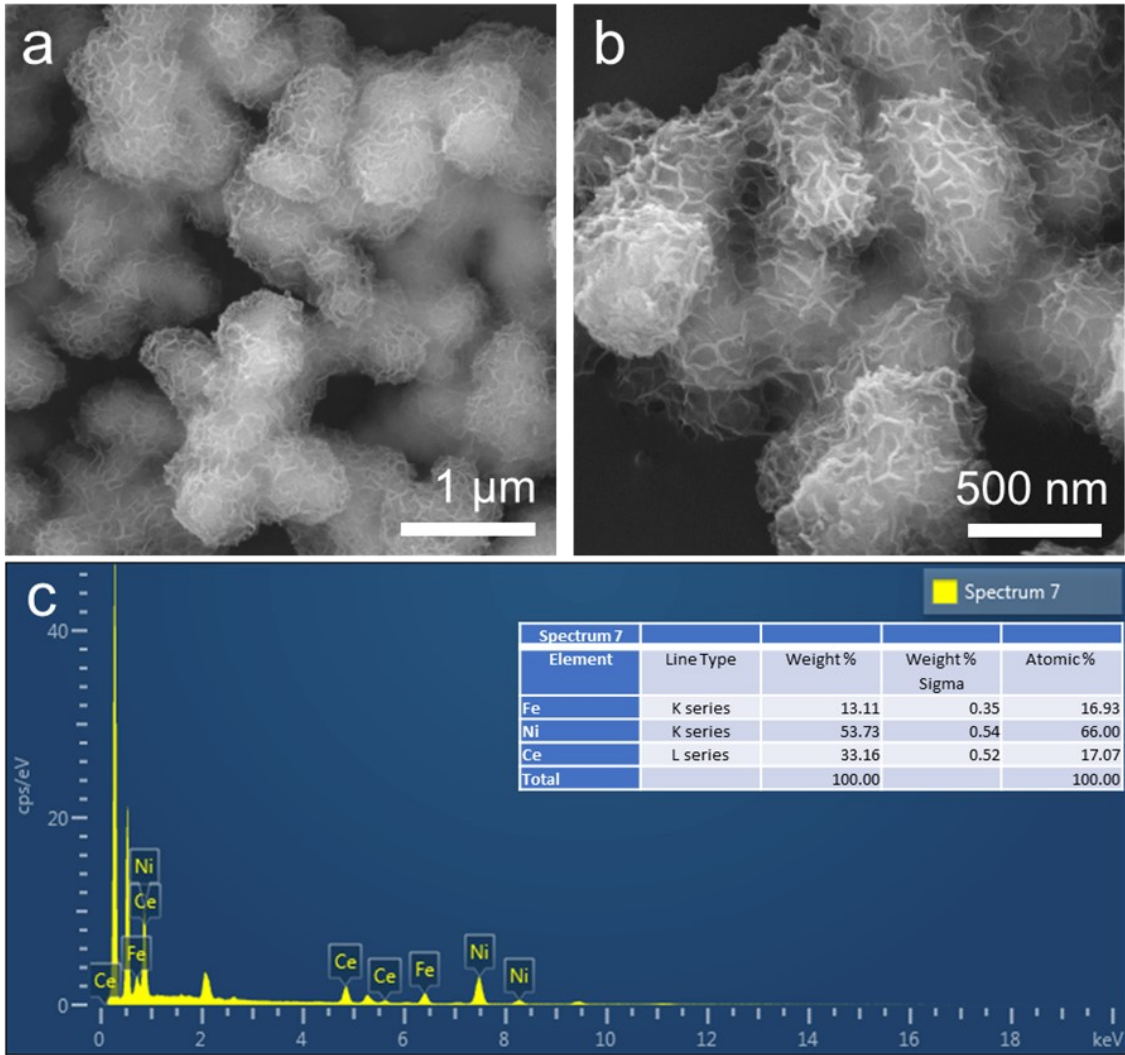

Figure S6. (a-b) SEM image and (c) EDX result of  $\text{Ni}_2\text{Fe}_{0.5}\text{Ce}_{0.5}$  PNs.

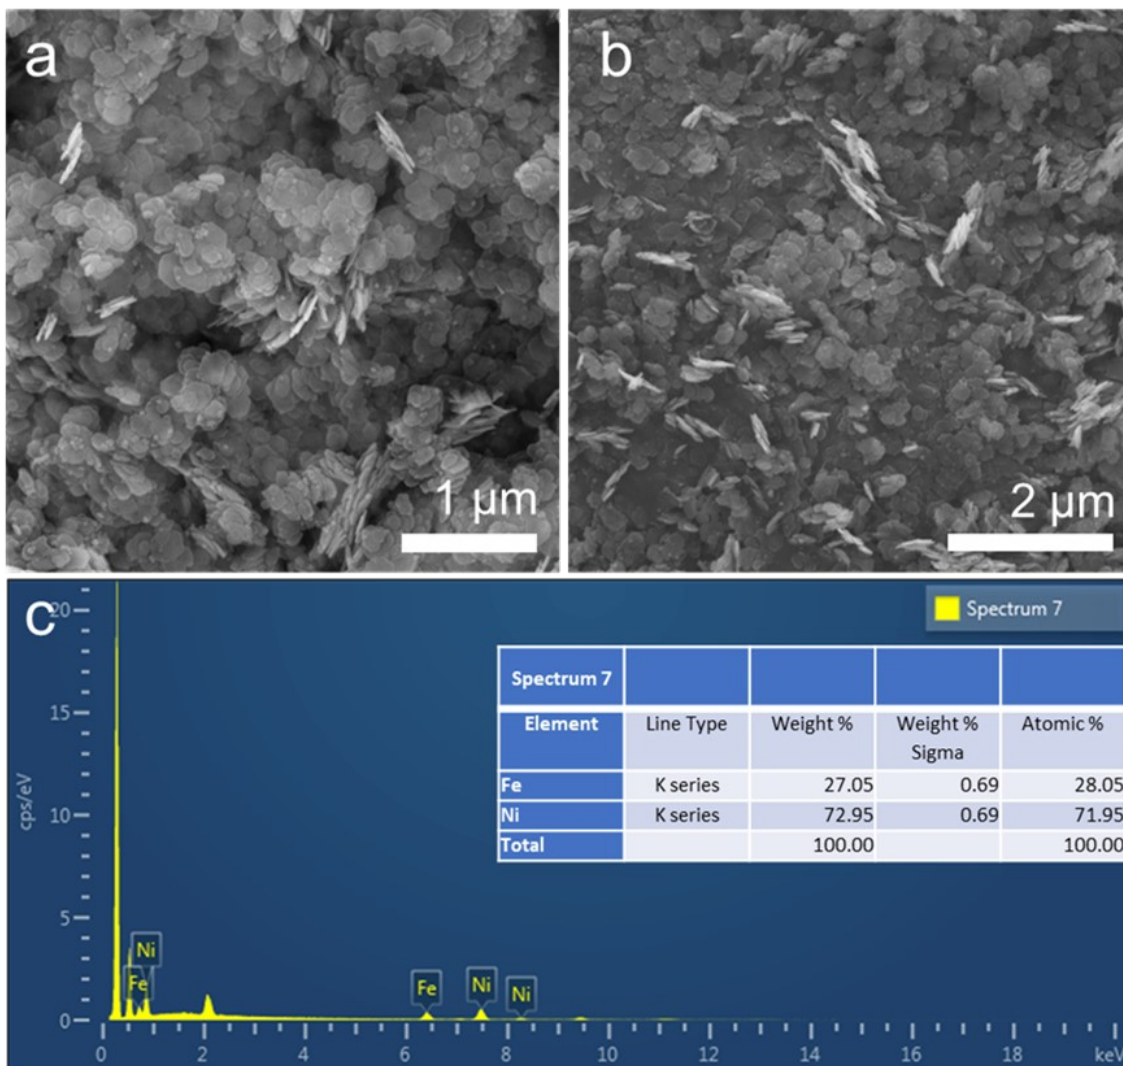

Figure S7. (a-b) SEM images and (c) EDX result of  $\text{Ni}_2\text{Fe}_1$  Ns.



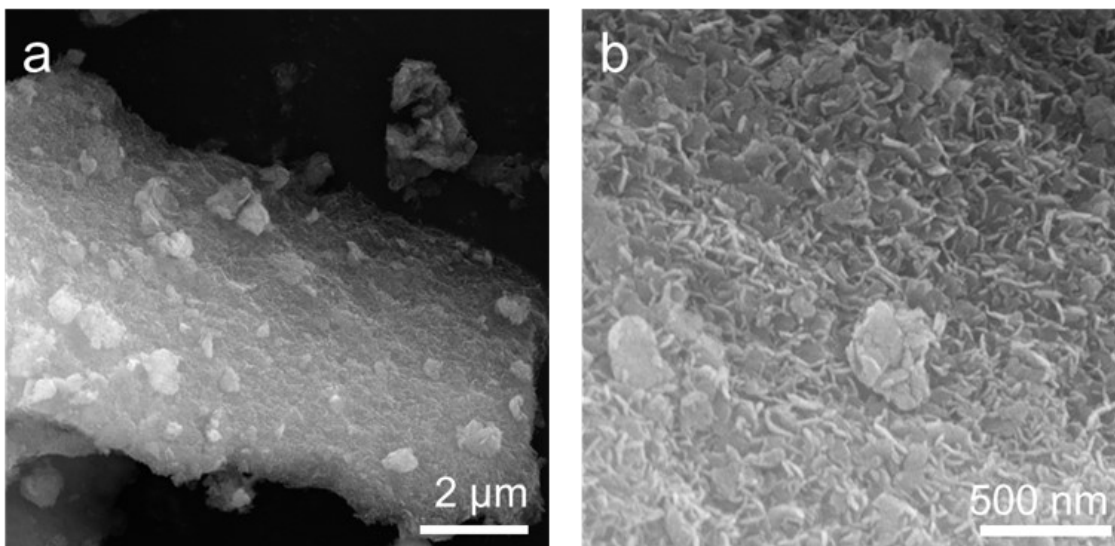

Figure S8. (a-b) SEM images of  $\text{Ni}_2\text{Fe}_1$  LDH product prepared without citrate additive.

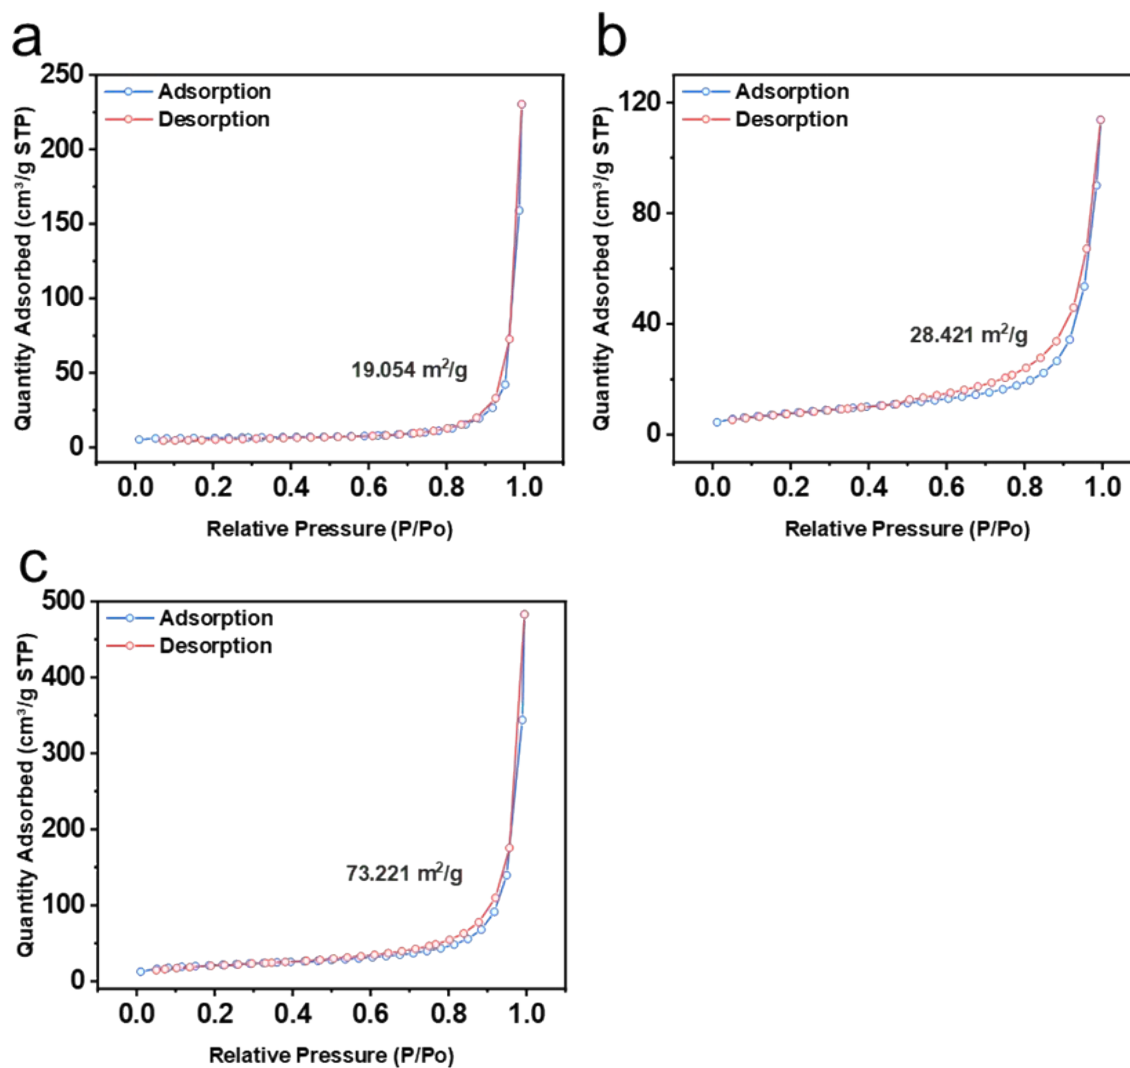

Figure S9.  $\text{N}_2$  sorption/desorption isotherms of (a)  $\text{Ni}_2\text{Fe}_1$  Ns, (b)  $\text{Ni}_2\text{Fe}_{0.7}\text{Ce}_{0.3}$  PN and (c)  $\text{Ni}_2\text{Fe}_1$  PN.

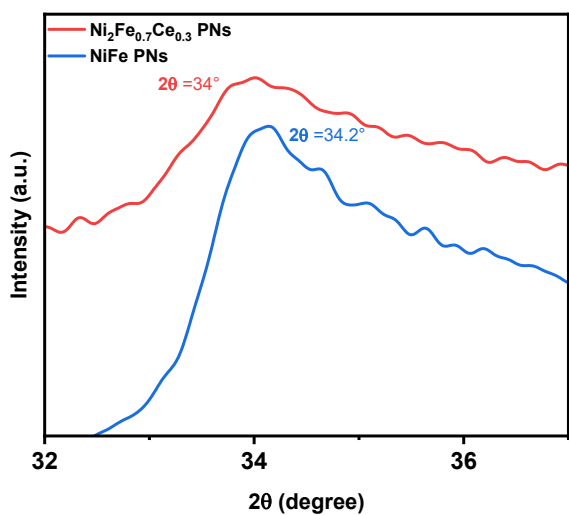

Figure S10. Magnified XRD pattern for (012) peak.

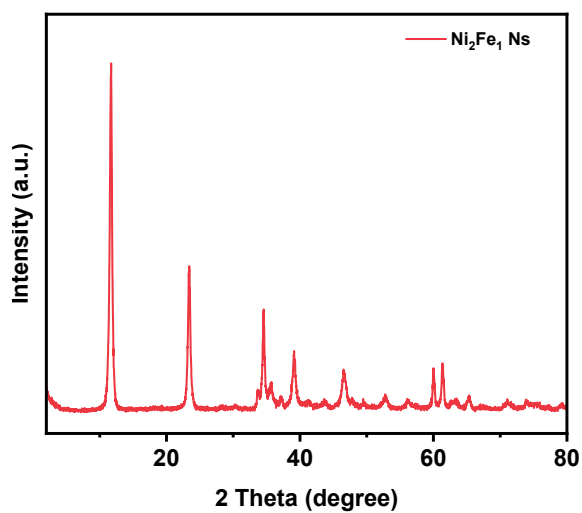

Figure S11. XRD patterns of  $\text{Ni}_2\text{Fe}_1$  Ns.

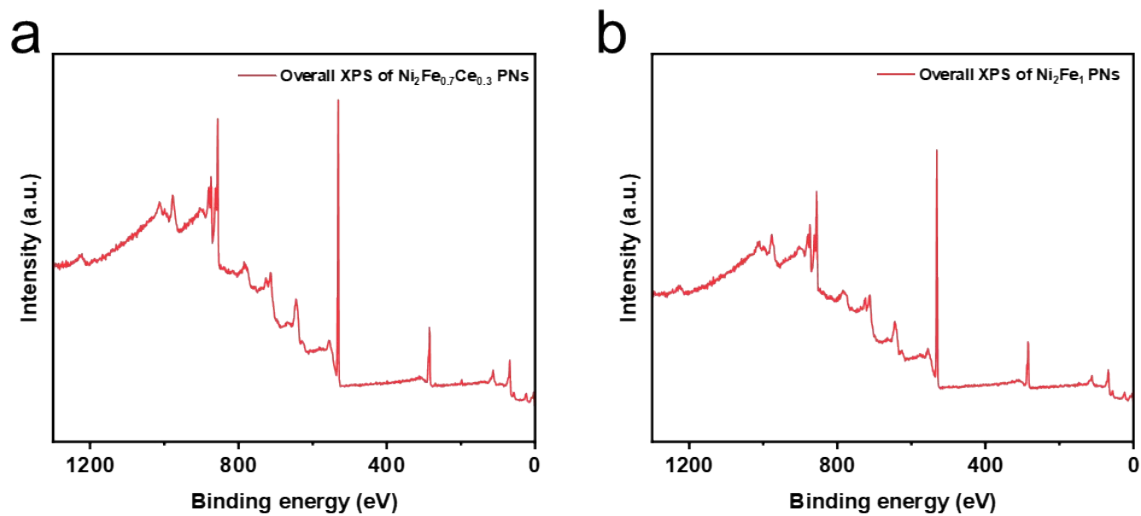

Figure S12. Overall XPS surveys of (a)  $\text{Ni}_2\text{Fe}_{0.7}\text{Ce}_{0.3}$  PNs and (b)  $\text{Ni}_2\text{Fe}_1$  PNs.

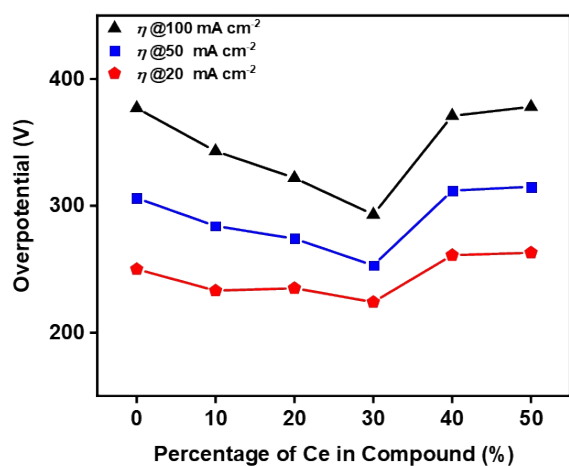

Figure S13. Overpotential at different current density.

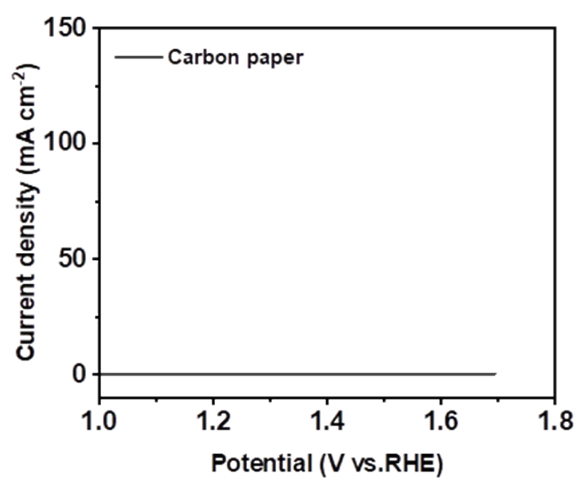

Figure S14. OER activity of carbon paper.

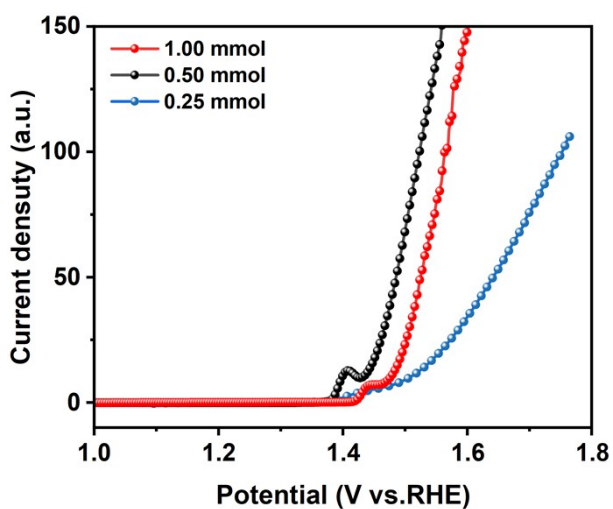

Figure S15. LSV curves of catalysts with different citrate additive amounts.

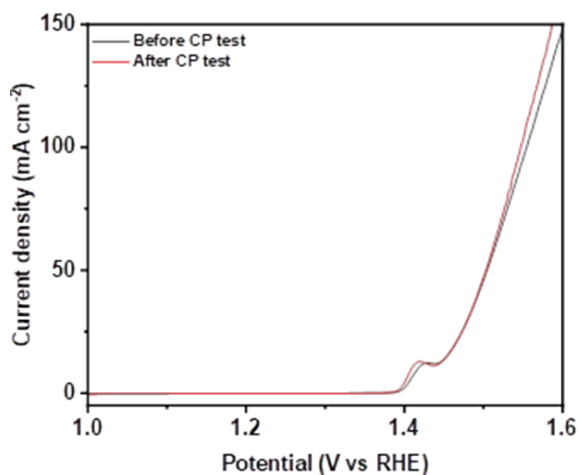

Figure S16. LSV curves of  $\text{Ni}_2\text{Fe}_{0.7}\text{Ce}_{0.3}$  PNs without iR-correction before and after Chronopotentiometric test.

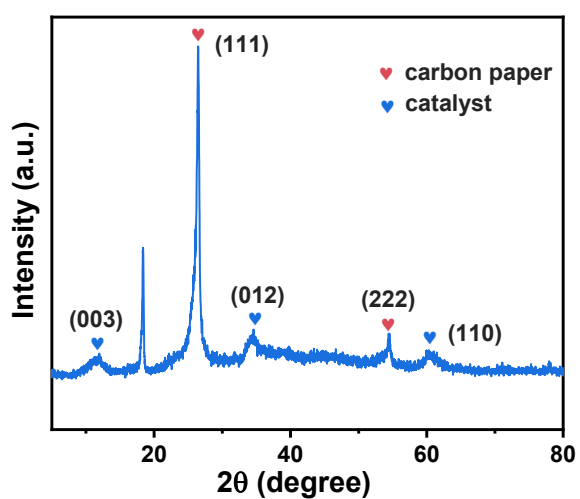

Figure S17. XRD pattern of  $\text{Ni}_2\text{Fe}_{0.7}\text{Ce}_{0.3}$  PNs after chronopotentiometric test.

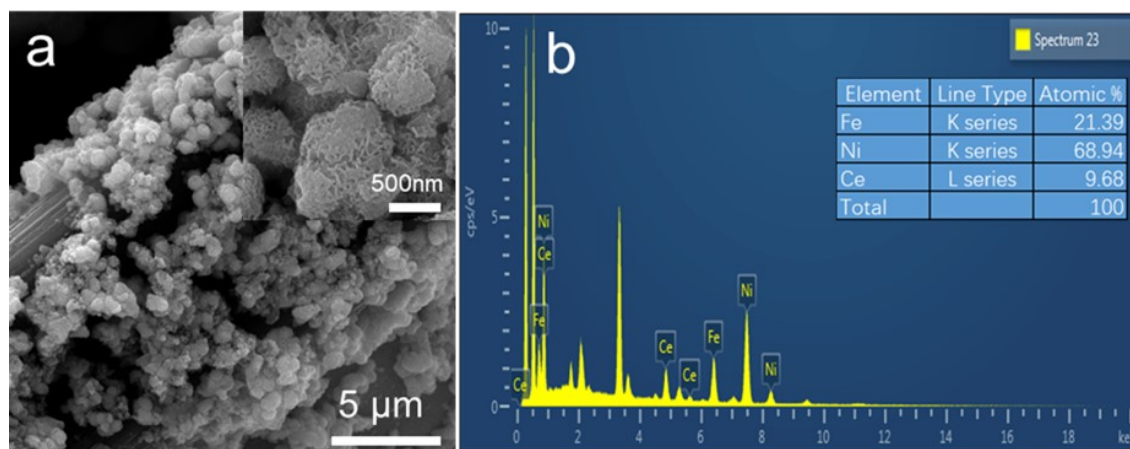

Figure S18. (a) SEM images and (b) EDX result after chronopotentiometric test.

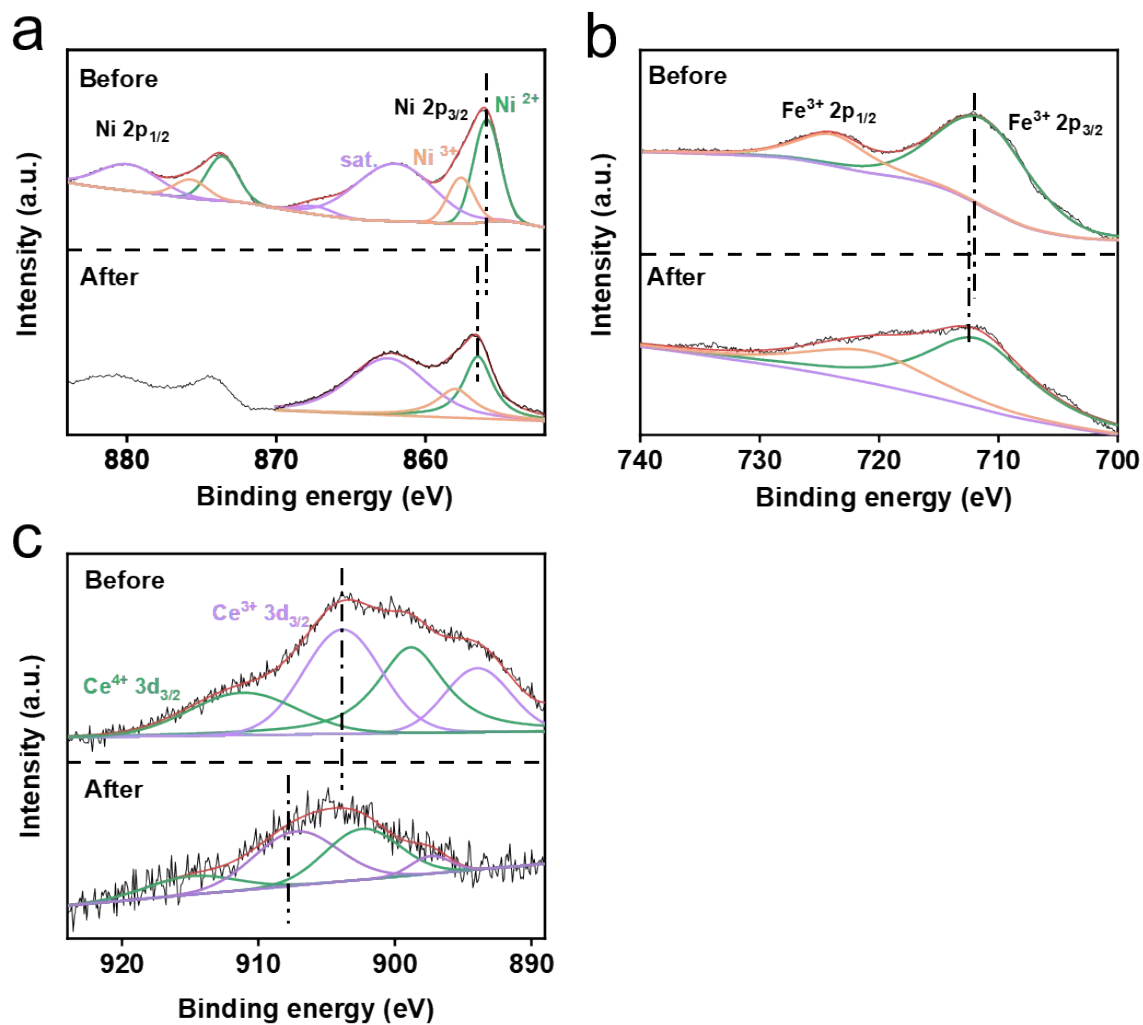

Figure S19. XPS spectra after the chronopotentiometric test. (a) Ni 2p, (b) Fe 2p and (c) Ce 3d.

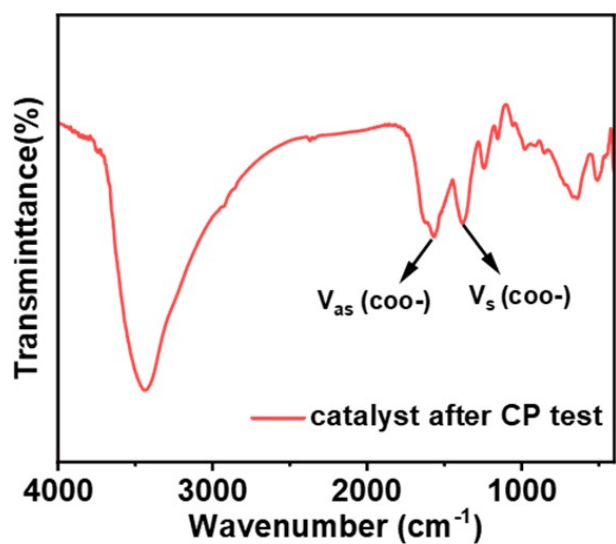

Figure S20. The FT-IR spectrum of Ni<sub>2</sub>Fe<sub>0.7</sub>Ce<sub>0.3</sub> PN after the chronopotentiometric test.

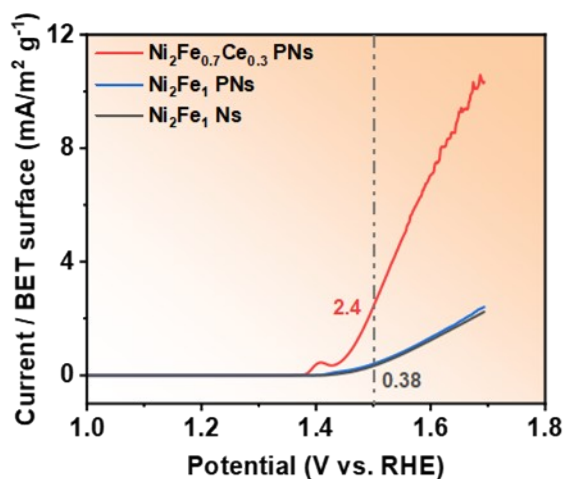

Figure S21. LSV curves normalized by BET surface areas.

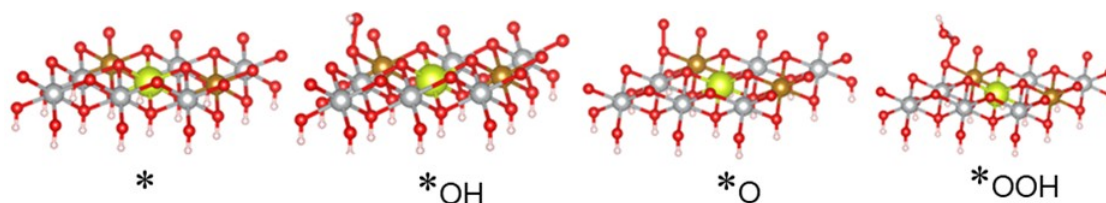

Figure S22. Adsorption models of each OER elementary step.

Table S1. Binding energies and corresponding fitting relative areas in XPS spectra

| Orbits                             | Ni <sub>2</sub> Fe <sub>0.7</sub> Ce <sub>0.3</sub> PNs | Ni <sub>2</sub> Fe <sub>1</sub> PNs |
|------------------------------------|---------------------------------------------------------|-------------------------------------|
| Fe <sup>3+</sup> 2p <sub>3/2</sub> | 711.43 eV / 311657.4                                    | 712.50 eV / 338187.2                |
| Fe <sup>3+</sup> 2p <sub>1/2</sub> | 724.09 eV / 155828.7                                    | 724.91 eV / 169093.6                |
| Ni <sup>2+</sup> 2p <sub>3/2</sub> | 856.07 eV / 214567.7                                    | 855.69 eV / 237217.3                |
| Ni <sup>3+</sup> 2p <sub>1/2</sub> | 857.63 eV / 96498.85                                    | 857.21 eV / 83106.64                |
| Ce <sup>3+</sup> 3d <sub>3/2</sub> | 904.33 eV / 57828.39                                    | /                                   |
| Ce <sup>4+</sup> 3d <sub>3/2</sub> | 910.83 eV / 70843.83                                    | /                                   |



Table S2. Overpotential delivering different current densities

|                                                     | <b>20mA cm<sup>-2</sup></b> | <b>50mA cm<sup>-2</sup></b> | <b>100mA cm<sup>-2</sup></b> |
|-----------------------------------------------------|-----------------------------|-----------------------------|------------------------------|
| Ni <sub>2</sub> Fe <sub>1</sub> PNs                 | 250                         | 306                         | 377                          |
| Ni <sub>2</sub> Fe <sub>0.9</sub> Ce <sub>0.1</sub> | 233                         | 284                         | 343                          |
| Ni <sub>2</sub> Fe <sub>0.8</sub> Ce <sub>0.2</sub> | 235                         | 274                         | 322                          |
| Ni <sub>2</sub> Fe <sub>0.7</sub> Ce <sub>0.3</sub> | 224                         | 253                         | 293                          |
| Ni <sub>2</sub> Fe <sub>0.6</sub> Ce <sub>0.4</sub> | 261                         | 312                         | 371                          |
| Ni <sub>2</sub> Fe <sub>0.5</sub> Ce <sub>0.5</sub> | 263                         | 315                         | 378                          |
| Ni <sub>2</sub> Fe <sub>1</sub> Ns                  | 352                         | 419                         | 534                          |
| RuO <sub>2</sub>                                    | 381                         |                             |                              |

Table S3. The values of parameters in the fitting circuit

|                      | <b>Ni<sub>2</sub>Fe<sub>0.5</sub>Ce<sub>0.5</sub></b> | <b>Ni<sub>2</sub>Fe<sub>0.6</sub>Ce<sub>0.4</sub></b> | <b>Ni<sub>2</sub>Fe<sub>0.7</sub>Ce<sub>0.3</sub></b> | <b>Ni<sub>2</sub>Fe<sub>0.8</sub>Ce<sub>0.2</sub></b> | <b>Ni<sub>2</sub>Fe<sub>0.5</sub>Ce<sub>0.5</sub></b> | <b>Ni<sub>2</sub>Fe<sub>1</sub> PNs</b> | <b>Ni<sub>2</sub>Fe<sub>1</sub> Ns</b> |
|----------------------|-------------------------------------------------------|-------------------------------------------------------|-------------------------------------------------------|-------------------------------------------------------|-------------------------------------------------------|-----------------------------------------|----------------------------------------|
|                      | <b>PNs</b>                                            | <b>PNs</b>                                            | <b>PNs</b>                                            | <b>PNs</b>                                            | <b>PNs</b>                                            |                                         |                                        |
| R <sub>s</sub> (Ω)   | 3.161                                                 | 2.941                                                 | 2.915                                                 | 2.877                                                 | 2.863                                                 | 2.783                                   | 2.821                                  |
| CPE-1-T              | 0.0049445                                             | 0.011861                                              | 0.01443                                               | 0.015921                                              | 0.0065464                                             | 0.00025401                              | 0.0020007                              |
| CPE-1-P              | 0.60365                                               | 0.54977                                               | 0.76804                                               | 0.81399                                               | 0.67977                                               | 0.87632                                 | 0.71344                                |
| R <sub>ct1</sub> (Ω) | 1.096                                                 | 1.187                                                 | 0.28386                                               | 0.24508                                               | 0.52489                                               | 0.64906                                 | 2.167                                  |
| CPE-2-T              | 0.054842                                              | 0.041936                                              | 0.070164                                              | 0.06374                                               | 0.064373                                              | 0.051382                                | 0.0078659                              |
| CPE-2-T              | 0.7567                                                | 0.78909                                               | 0.86533                                               | 0.85811                                               | 0.79748                                               | 0.65801                                 | 0.7131                                 |
| R <sub>ct2</sub> (Ω) | 9.384                                                 | 7.162                                                 | 4.232                                                 | 4.563                                                 | 4.379                                                 | 5.229                                   | 20.98                                  |

Table S4. OER activity of recently reported NiFe-based catalysts

| Catalysts                                                                       | Overpotential at<br>20 mA cm <sup>-2</sup> | Supporter                        | Loading<br>Capacity (mg<br>cm <sup>-1</sup> ) | References |
|---------------------------------------------------------------------------------|--------------------------------------------|----------------------------------|-----------------------------------------------|------------|
| Ni <sub>2</sub> Fe <sub>0.7</sub> Ce <sub>0.3</sub> PNs                         | 224                                        | CP                               | 0.4                                           | This work  |
| NiFeS@Ti <sub>3</sub> C <sub>2</sub><br>MXene/NF                                | 290                                        | NF                               | 1.25                                          | 1          |
| CoO@NiFe<br>LDH/NF                                                              | 225                                        | NF                               | 0.78                                          | 2          |
| Co <sub>1.98</sub> -NiFe LDH                                                    | 236                                        | CP                               | 1                                             | 3          |
| Fe <sub>2</sub> P-NiCoP                                                         | 239                                        | NF                               |                                               | 4          |
| NiFe LDH-Ci/CC                                                                  | 240                                        | CC                               | 0.67                                          | 5          |
| Ni-Fe LDH<br>DSNCs                                                              | 246                                        | CP                               | 0.22                                          | 6          |
| NiFeW-<br>LDH@CP                                                                | 248                                        | CP                               | 0.8                                           | 7          |
| NiFe <sub>2</sub> O <sub>4</sub> @N/rGO                                         | 252                                        | NF                               | 1                                             | 8          |
| NiFe-Pi/P                                                                       | 255                                        | NF                               | 2                                             | 9          |
| (Ni <sub>0.5</sub> Fe <sub>0.5</sub> )C <sub>2</sub> O <sub>4</sub><br>nanorods | 266                                        | NF                               |                                               | 10         |
| NiFe PBAs                                                                       | 267                                        | rotating disk<br>electrode (RDE) | 0.15                                          | 11         |
| CNT@NiFe-LDH<br>NS                                                              | 270                                        | NF                               | 0.5                                           | 12         |
| MoNiFe-LDH                                                                      | 317                                        | glass carbon                     |                                               | 13         |

CP, CC, NF refer to carbon paper, carbon cloth and nickel foam respectively.

## References

1. D. Chanda, K. Kannan, J. Gautam, M. M. Meshesha, S. G. Jang, V. A. Dinh and B. L. Yang, *Appl. Catal., B*, 2023, **321**.
2. Z. Wang, J. Zhang, Q. Yu, H. Yang, X. Chen, X. Yuan, K. Huang and X. Xiong, *Chem. Eng. J.*, 2021, **410**.
3. Y. Yang, S. Wei, Y. Li, D. Guo, H. Liu and L. Liu, *Appl. Catal., B*, 2022, **314**.
4. M. Xiao, C. Zhang, P. Wang, W. Zeng, J. Zhu, Y. Li, W. Peng, Q. Liu, H. Xu, Y. Zhao, H. Li, L. Chen, J. Yu and S. Mu, *Materials Today Physics*, 2022, **24**.
5. Z. Wang, J. Zhang, Q. Wang, X. Jiang, K. Huang and X. Xiong, *Journal of Materials Science*, 2021, **56**, 8115-8126.
6. J. Zhang, L. Yu, Y. Chen, X. F. Lu, S. Gao and X. W. D. Lou, *Adv Mater*, 2020, **32**, e1906432.
7. P.-F. Guo, Y. Yang, W.-J. Wang, B. Zhu, W.-T. Wang, Z.-Y. Wang, J.-L. Wang, K. Wang, Z.-H. He and Z.-T. Liu, *Chem. Eng. J.*, 2021, **426**.

8. L. Cao, Z. Li, K. Su, M. Zhang and B. Cheng, *Journal of Energy Chemistry*, 2021, **54**, 595-603.
9. W. Li, M. Chen, Y. Lu, P. Qi, G. Liu, Y. Zhao, H. Wu and Y. Tang, *Applied Surface Science*, 2022, **598**.
10. H. Hu, X. Lei, S. Li, R. Peng and J. Wang, *New Journal of Chemistry*, 2022, **46**, 328-333.
11. M. Jiang, X. Fan, S. Cao, Z. Wang, Z. Yang and W. Zhang, *Journal of Materials Chemistry A*, 2021, **9**, 12734-12745.
12. H. Chen, P. Zhang, R. Xie, Y. Xiong, C. Jia, Y. Fu, P. Song, L. Chen, Y. Zhang and T. Liao, *Advanced Materials Interfaces*, 2021, **8**.
13. Z. Yin, X. Liu, M. Cui, Z. Cao, A. Liu, L. Gao, T. Ma, S. Chen and Y. Li, *Materials Today Sustainability*, 2022, **17**.
